# Supplementary material for: Controllable conversion of Prussian blue@yeast bio-template into 3D cage-like magnetic Fe3O4@N-doped carbon absorbent and its cohesive regeneration by persulfate activation
Source: Royal Society of Chemistry journal article supplement (doi:10.1039/c8ra08886a), 2019-01-01
Supplement: c8ra08886a1.pdf [file c8ra08886a1.pdf]

## **Electronic Supplementary Information**

### **(ESI)**

# **Controllable Conversion of Prussian blue@yeast bio-template into 3D Cage-like Magnetic Fe<sub>3</sub>O<sub>4</sub>@N-doped Carbon Absorbent and its Cohesive Regeneration by Persulfate Activation**

Si Chen <sup>a, b</sup>, Bo Bai <sup>\*, b, c, d</sup>, Yunhua He <sup>a, b</sup>, Na Hu <sup>c, d</sup>, Honglun Wang <sup>c, d</sup>, Yourui Suo <sup>c, d</sup>

<sup>a</sup> Key Laboratory of Subsurface Hydrology and Ecological Effects in Arid Region of the Ministry of Education, Chang'an University, No. 126 Yanta Road, Xi'an 710054, Shaanxi, China,

<sup>b</sup> College of Environmental Science and Engineering, Chang'an University, Xi'an, 710054, P.R. China;

<sup>c</sup> Key Laboratory of Tibetan Medicine Research, Northwest Institute of Plateau Biology, Chinese Academy of Sciences, Xining, 810008, China;

<sup>d</sup> Qinghai Provincial Key Laboratory of Tibetan Medicine Research, Xining, 810001, P.R. China)

\* Corresponding author

Email address: baibochina@163.com

Tel: +86 29 82339052

Fax: +86 29 82339961

## Contents

**Fig. S1 FE-SEM images of (a-b)  $\text{Fe}_3\text{O}_4@\text{C}$  (1:0.05); (c-d)  $\text{Fe}_3\text{O}_4@\text{C}$  (1:0.22).**

**Fig. S2 EDS analysis of (a)  $\text{Fe}_3\text{O}_4@\text{C}$  (1:0.05) and (b)  $\text{Fe}_3\text{O}_4@\text{C}$  (1:0.22).**

Fig. S3 EDS analysis of N-doped  $\text{Fe}_3\text{O}_4@\text{C}$  (1:0.11) and the corresponding mapping images.

**Fig. S4 XRD patterns of PB@yeast bio-templates.**

**Fig. S5 Linear fits of experimental data for (a) Langmuir isotherm model; (b) Freundlich isotherm model; (c) pseudo-first kinetic model; (d) pseudo-second kinetic model.**

**Fig. S6 Linear fits at different temperature for (a) Langmuir isotherm model and (b) Freundlich isotherm model.**

**Table S1 Comparison of maximum adsorption capacities of adsorbents for RhB in previous literatures**

**Table S2 Kinetic parameters for RhB adsorption at different initial concentration**

**Table S3 Adsorption isotherm parameters for RhB adsorption at different temperatures**

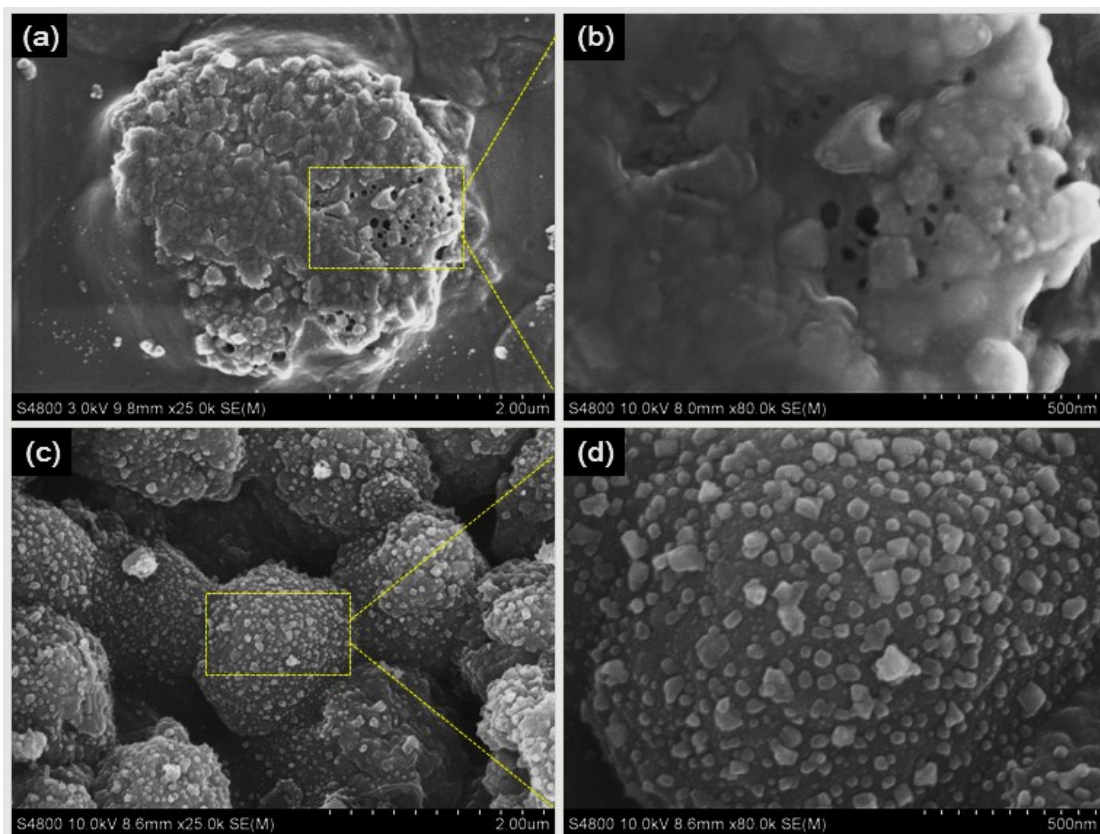

Fig. S1 FE-SEM images of (a-b)  $\text{Fe}_3\text{O}_4@\text{C}$  (1:0.05) and (c-d)  $\text{Fe}_3\text{O}_4@\text{C}$  (1:0.22).

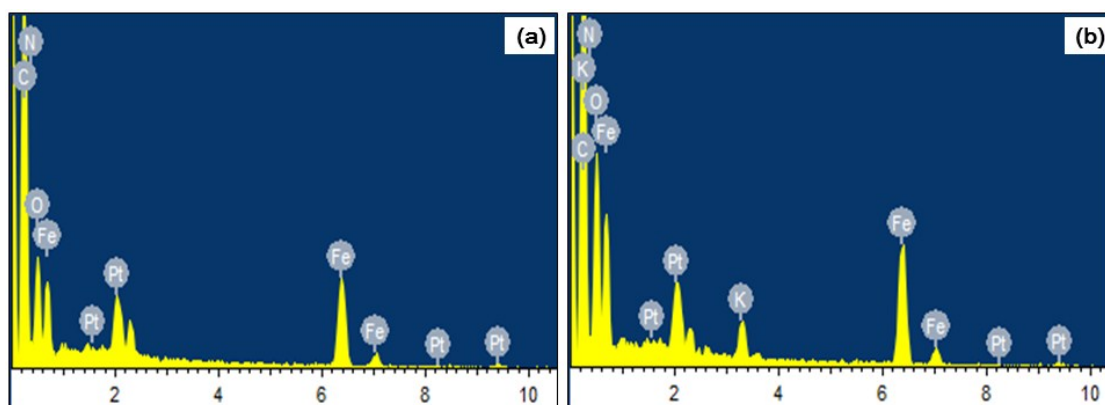

Fig. S2 EDS analysis of (a)  $\text{Fe}_3\text{O}_4@\text{C}$  (1:0.05) and (b)  $\text{Fe}_3\text{O}_4@\text{C}$  (1:0.22).

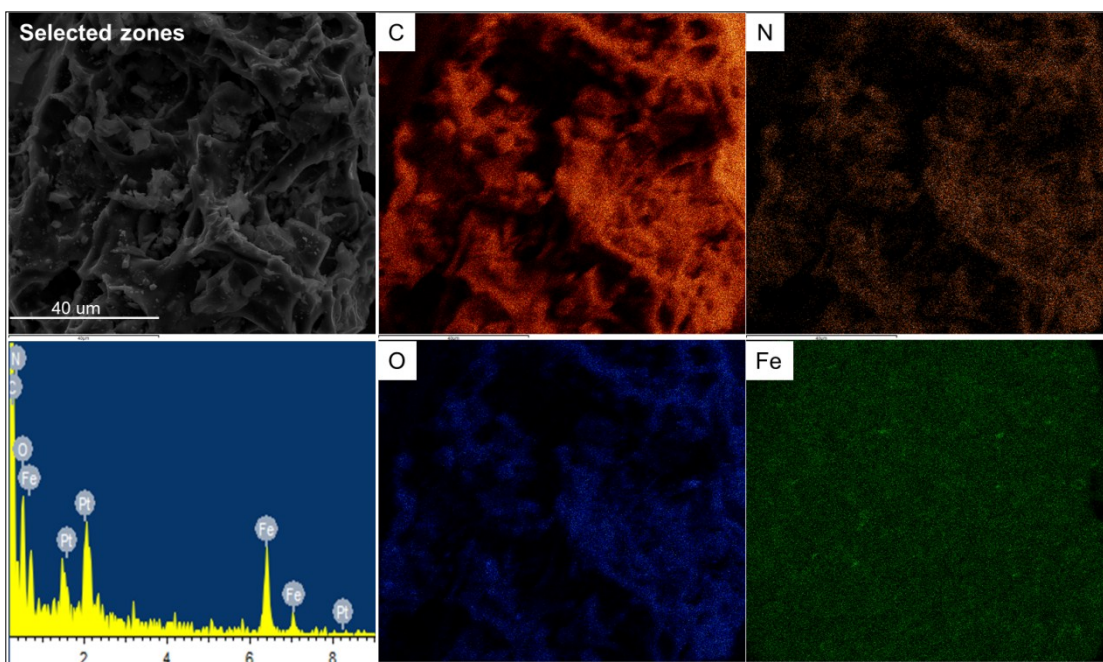

Fig. S3 EDS analysis of N-doped  $\text{Fe}_3\text{O}_4@\text{C}$  (1:0.11) and the corresponding mapping images.

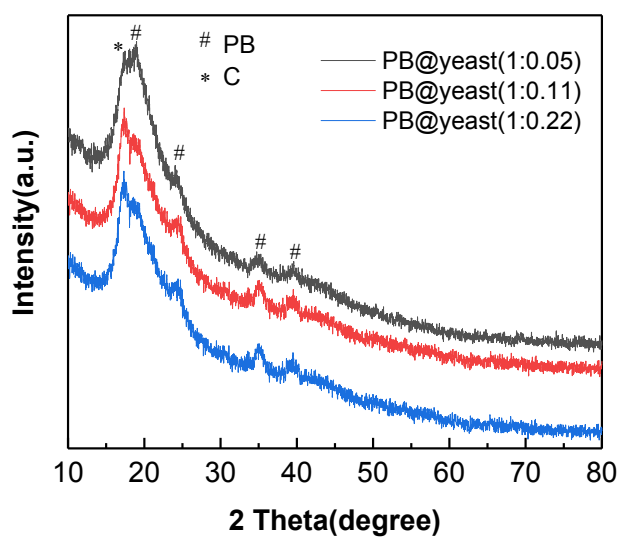

Fig. S4 XRD patterns of PB@yeast bio-templates.

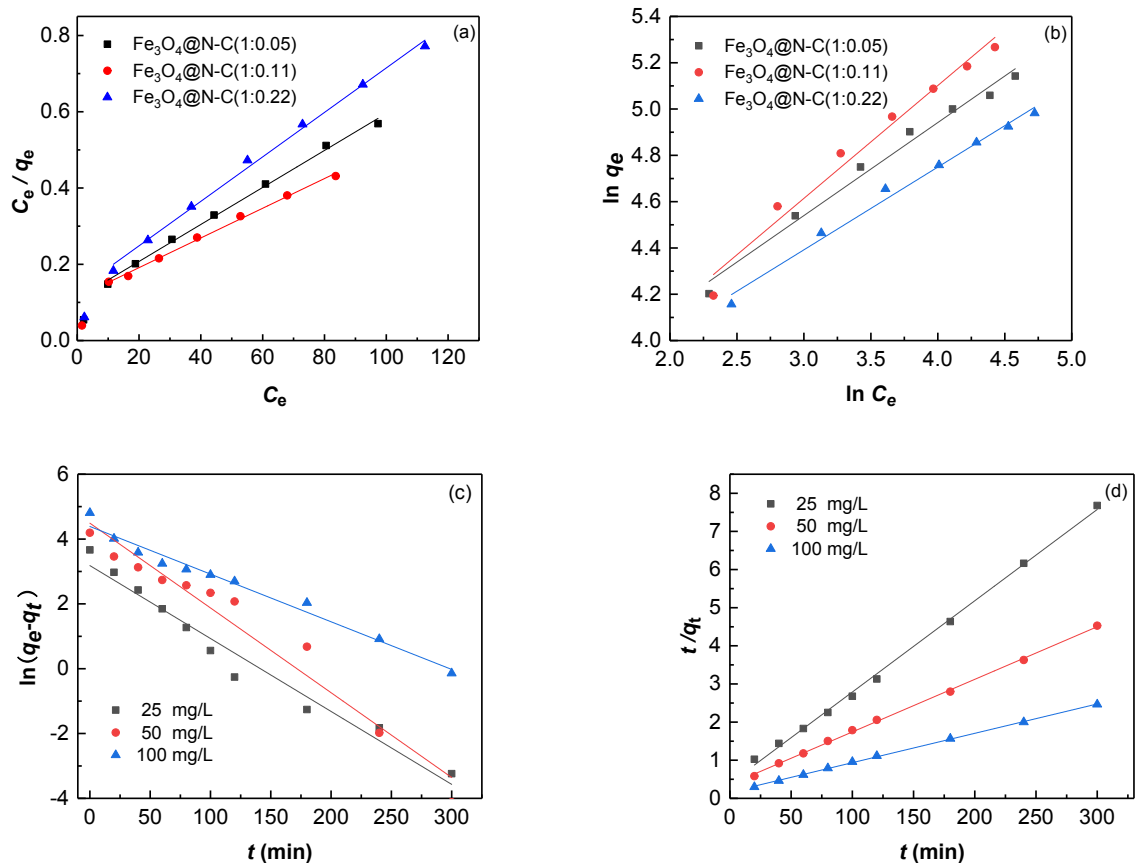

**Fig. S5** Linear fits of experimental data for (a) Langmuir isotherm model; (b) Freundlich isotherm model; (c) pseudo-first kinetic model; (d) pseudo-second kinetic model.

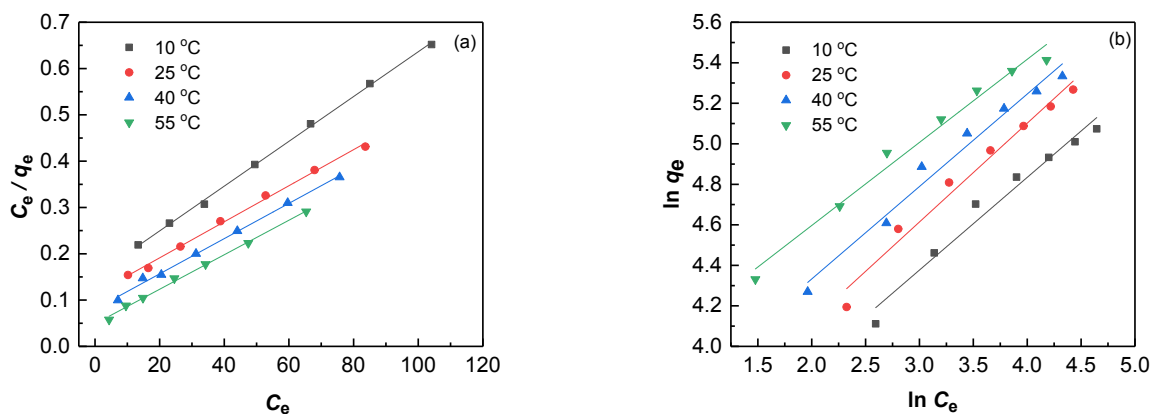

**Fig. S6** Linear fits at different temperature for (a) Langmuir isotherm model and (b) Freundlich isotherm model.

**Table S1 Comparison of maximum adsorption capacities of adsorbents for RhB in previous literatures**

| Adsorbent                                                             | $T$ (°C) | pH  | $q_{\max}$<br>( $\text{mg}\cdot\text{g}^{-1}$ ) | References |
|-----------------------------------------------------------------------|----------|-----|-------------------------------------------------|------------|
| gelatin/activated carbon composite beads(GE/AC)                       | 60       | 4.0 | 256.41                                          | 1          |
| Fe <sub>3</sub> O <sub>4</sub> /RGO                                   | 60       | 5.3 | 142.86                                          | 2          |
| In-MOF@GO-2                                                           | 25       | 6.0 | 267                                             | 3          |
| iron-pillared bentonite (Fe-Ben)                                      | 25       | 5.0 | 98.6                                            | 4          |
| carbonaceous adsorbent (TPC)prepared from<br>Thespusia populinia bark | 60       | 7.0 | 77.18                                           | 5          |
| Fe <sub>3</sub> O <sub>4</sub> @N-C (1:0.05)                          | 25       | 6.0 | 206.19                                          | This study |
| Fe <sub>3</sub> O <sub>4</sub> @N-C (1:0.11)                          | 25       | 6.0 | 257.06                                          | This study |
| Fe <sub>3</sub> O <sub>4</sub> @N-C (1:0.22)                          | 25       | 6.0 | 171.53                                          | This study |

**Table S2 Kinetic parameters for RhB adsorption at different initial concentration**

| Kinetic models           | Parameters                                                        | $C_0$ of RhB ( $\text{mg}\cdot\text{L}^{-1}$ ) |        |         |
|--------------------------|-------------------------------------------------------------------|------------------------------------------------|--------|---------|
|                          |                                                                   | 25                                             | 50     | 100     |
| Pseudo-first-order       | $q_{e,\text{exp}} (\text{mg}\cdot\text{g}^{-1})$                  | 39.06                                          | 66.28  | 122.61  |
|                          | $q_{e,\text{cal}} (\text{mg}\cdot\text{g}^{-1})$                  | 8.65                                           | 12.20  | 11.93   |
|                          | $k_1 (\text{min}^{-1})$                                           | 0.0225                                         | 0.0262 | 0.0147  |
|                          | $R^2$                                                             | 0.9643                                         | 0.9515 | 0.9747  |
| pseudo-second-order      | $q_{e,\text{cal}} (\text{mg}\cdot\text{g}^{-1})$                  | 41.77                                          | 72.46  | 129.87  |
|                          | $k_2 \times 10^{-3} (\text{g}\cdot\text{mg}^{-1}\text{min}^{-1})$ | 1.4537                                         | 0.5262 | 0.3576  |
|                          | $R^2$                                                             | 0.9977                                         | 0.9989 | 0.9993  |
| intra-particle diffusion | $k_{1d} (\text{mg}\cdot\text{g}^{-1}\text{min}^{-0.5})$           | 4.6083                                         | 5.6125 | 10.3763 |
|                          | $R^2$                                                             | 0.9788                                         | 0.9968 | 0.9841  |
|                          | $k_{2d} (\text{mg}\cdot\text{g}^{-1}\text{min}^{-0.5})$           | 1.7468                                         | 2.3845 | 3.2649  |
|                          | $R^2$                                                             | 0.9605                                         | 0.9960 | 0.9961  |
|                          | $k_{3d} (\text{mg}\cdot\text{g}^{-1}\text{min}^{-0.5})$           | 0.0959                                         | 0.1495 | 0.9077  |
| $R^2$                    | 0.8401                                                            | 0.5680                                         | 0.9273 |         |

**Table S3 Adsorption isotherm parameters for RhB adsorption at different temperatures**

| T (°C) | Langmuir Model                      |                                |        |           | Freundlich Model |                                |        |
|--------|-------------------------------------|--------------------------------|--------|-----------|------------------|--------------------------------|--------|
|        | $q_{\max}$<br>(mg·g <sup>-1</sup> ) | $K_L$<br>(L ·g <sup>-1</sup> ) | $R^2$  | $R_L$     | $1/n$            | $K_F$<br>(L ·g <sup>-1</sup> ) | $R^2$  |
| 10     | 206.61                              | 0.0317                         | 0.9988 | 0.14-0.39 | 0.4575           | 8.1669                         | 0.9709 |
| 25     | 257.06                              | 0.0343                         | 0.9965 | 0.13-0.37 | 0.4874           | 8.5676                         | 0.9778 |
| 40     | 262.46                              | 0.0437                         | 0.9954 | 0.10-0.30 | 0.4564           | 9.2963                         | 0.9772 |
| 55     | 268.10                              | 0.0764                         | 0.9965 | 0.06-0.21 | 0.4101           | 10.265                         | 0.9825 |



## References

- 1 F. Hayeeye, M. Sattar, W. Chinpa and O. Sirichote, *Colloid Surface A*, 2017,**513**, 259-266.
- 2 Y. Qin, M. Long, B. Tan and B. Zhou, *Nano-Micro Lett.*, 2014, **6**, 125-135.
- 3 C. Yang, S. Wu, J. Cheng and Y. Chen, *J. Alloy Compd.*, 2016,**687**,804-812.
- 4 M.F. Hou, C.X. Ma, W.D. Zhang, X.Y. Tang, Y.N. Fan and H.F. Wan, *J. Hazard. Mater.* 2011,**186**,1118-1123.
- 5 M. Hema and S. Arivoli, *Indian J. Chem. Technol.* 2009, **16**, 38-45.
